# Supplementary material for: Enhancing the energy barrier and hysteresis temperature in two benchtop-stable Ho(iii) single-ion magnets
Source: Royal Society of Chemistry journal article supplement (doi:10.1039/d1cc00582k), 2021-01-01
Supplement: d1cc00582k1.pdf [file d1cc00582k1.pdf]

# Electronic Supplementary Information for

## Enhancing the energy barrier and hysteresis temperature in two benchtop-stable Ho(III) single-ion magnets

Kexin Jia, Xixi Meng, Mengmeng Wang, Xiaoshuang Gou, Yu-xia Wang, Na Xu,\*  
Wei Shi and Peng Cheng\*

Department of Chemistry, College of Chemistry, Nankai University, Tianjin 300071, China.

E-mail: [naxu@nankai.edu.cn](mailto:naxu@nankai.edu.cn); [pcheng@nankai.edu.cn](mailto:pcheng@nankai.edu.cn).

### Table of Contents

|                                              |    |
|----------------------------------------------|----|
| 1. Syntheses and physical measurements ..... | 2  |
| 2. Structure and crystal data .....          | 3  |
| 3. Magnetic characterization data .....      | 10 |
| References .....                             | 13 |

# 1. Syntheses and physical measurements

## General procedure for the synthesis of $[\text{Ho}(\text{tprpo})_2(\text{H}_2\text{O})_5]\text{X}_3 \cdot \text{H}_2\text{O}$

The solutions of  $\text{HoX}_3 \cdot 6\text{H}_2\text{O}$  ( $\text{X} = \text{Cl}$ , **1**;  $\text{Br}$ , **2**) (0.05 mmol) in 0.5 mL methanol and tprpo (0.1 mmol) in 5 mL acetonitrile were mixed. The reaction mixture was sealed in a 10 mL vial and kept at 80 °C for 12 h. After filtering, the clear filtrate was evaporated in an ambient environment, giving transparent microcrystals within two days. These microcrystals were further purified by washing with ethyl acetate and recrystallizing in acetonitrile to obtain hexagonal block crystals for single-crystal X-ray analysis.

$[\text{Ho}(\text{tprpo})_2(\text{H}_2\text{O})_5]\text{Cl}_3 \cdot \text{H}_2\text{O}$  (**1**) 22% yield based on  $\text{HoCl}_3 \cdot 6\text{H}_2\text{O}$ . Elemental analysis for  $\text{C}_{24}\text{H}_{60}\text{Cl}_3\text{N}_6\text{O}_8\text{P}_2\text{Ho}$ : calcd (%) C, 32.24; H, 6.76; N, 9.34; found (%) C, 31.91; H, 6.85; N, 8.96. FT-IR ( $\text{cm}^{-1}$ ): 3228 (m), 3135 (m), 2958 (m), 2861 (m), 2283 (vw), 1659 (w), 1481 (w), 1446 (w), 1348 (w), 1291 (w), 1245 (m), 1204 (m), 1123 (s), 1072 (vs), 1008 (s), 962 (vw), 914 (w), 870 (m), 766 (m), 696 (s), 626 (m), 575 (vs), 529 (s).

$[\text{Ho}(\text{tprpo})_2(\text{H}_2\text{O})_5]\text{Br}_3 \cdot \text{H}_2\text{O}$  (**2**) 26% yield based on  $\text{HoBr}_3 \cdot 6\text{H}_2\text{O}$ . Elemental analysis for  $\text{C}_{24}\text{H}_{60}\text{Br}_3\text{N}_6\text{O}_8\text{P}_2\text{Ho}$ : calcd (%) C, 29.06; H, 5.89; N, 8.18; found (%) C, 29.16; H, 5.49; N, 8.37. FT-IR ( $\text{cm}^{-1}$ ): 3334 (m), 3250 (m), 3176 (m), 2964 (m), 2863 (m), 2304 (vw), 1649 (w), 1636 (w), 1589 (vw), 1446 (w), 1344 (w), 1290 (w), 1243 (m), 1202 (m), 1110 (s), 1082 (vs), 1013 (s), 962 (m), 907 (m), 865 (m), 766 (m), 648 (s), 579 (vs), 537 (s).

## Physical measurements

All chemicals and solvents were used in experiments as received without further treatment. The elemental analyses for carbon, hydrogen, and nitrogen were carried out using a PerkinElmer 240 CHN elemental analyzer. Powder X-ray diffraction patterns were recorded on a Rigaku Smartlab SE X-ray diffractometer. The Fourier Transform infrared spectroscopy (FTIR) measurements were carried out using a Bruker ALPHA FTIR spectrometer. Thermogravimetric analyses were performed on Mettler Toledo TGA 2 apparatus in the range of 40-800 °C with a heating rate of 10 K  $\text{min}^{-1}$  under the nitrogen condition. The magnetic characterizations were performed on a Quantum Design SQUID MPMS VSM magnetometer. To eliminate the influence of diamagnetic atoms and sample holders, magnetic susceptibility data were corrected by Pascal's coefficient.

## X-ray crystallography

The crystallographic data of **1** and **2** were measured on a Rigaku XtaLAB Mini II single-crystal diffractometer at room temperature with graphite monochromatic ( $\text{Mo K}\alpha$  X-ray source,  $\lambda = 0.71073 \text{ \AA}$ ). The structures were solved by direct methods and further refined using the least-squares method with the *SHELXL-2017* programs. The non-hydrogen atoms have been refined using anisotropy thermal factors, while the hydrogen atoms were assumed to be isotropic and situated in theoretical positions.<sup>1</sup>

## 2. Structure and crystal data

**Table S1.** Comparison of the magnetic properties of **1** and **2** with reported Ho(III)-SIMs.

| Complex                                                                                                                                 | Symmetry     | $U_{\text{eff}}$ (K) | $H_{\text{dc}}$ (Oe) | $T_{\text{B}}$ (K) | Field sweep rate (Oe s <sup>-1</sup> ) | Reference |
|-----------------------------------------------------------------------------------------------------------------------------------------|--------------|----------------------|----------------------|--------------------|----------------------------------------|-----------|
| [Ho(tprpo) <sub>2</sub> (H <sub>2</sub> O) <sub>5</sub> ]Cl <sub>3</sub> ·H <sub>2</sub> O                                              | $D_{5h}$     | 351                  | 0                    | 8                  | 20                                     | This work |
| [Ho(tprpo) <sub>2</sub> (H <sub>2</sub> O) <sub>5</sub> ]Br <sub>3</sub> ·H <sub>2</sub> O                                              | $D_{5h}$     | 418                  | 0                    | 15                 | 20                                     | This work |
| [HoNi <sub>5</sub> (quinha) <sub>5</sub> F <sub>2</sub> (dfpy) <sub>10</sub> ](ClO <sub>4</sub> ) <sub>2</sub> ·2EtOH                   | $D_{5h}$     | 831                  | 0                    | 3.5                | 3200                                   | 2         |
| [Ho(OSiMe <sub>3</sub> ) <sub>2</sub> (py) <sub>5</sub> ][BPh <sub>4</sub> ]                                                            | $D_{5h}$     | 715                  | 0                    | -                  | -                                      | 3         |
| [Ho(OCH(CH <sub>3</sub> )C <sub>6</sub> H <sub>5</sub> ) <sub>2</sub> (py) <sub>5</sub> ][BPh <sub>4</sub> ]                            | $D_{5h}$     | 499                  | 0                    | -                  | -                                      | 3         |
| [Ho(OC <sub>6</sub> H <sub>3</sub> (CH <sub>3</sub> ) <sub>2</sub> ) <sub>2</sub> (py) <sub>5</sub> ][BPh <sub>4</sub> ]                | $D_{5h}$     | 397                  | 0                    | -                  | -                                      | 3         |
| [(L <sup>1</sup> ) <sub>2</sub> Ho(H <sub>2</sub> O) <sub>5</sub> ][I <sub>3</sub> ·(L <sup>1</sup> ) <sub>2</sub> ·(H <sub>2</sub> O)] | $D_{5h}$     | 355                  | 0                    | 4                  | 270                                    | 4         |
| [Ho(CyPh <sub>2</sub> PO) <sub>2</sub> (H <sub>2</sub> O) <sub>5</sub> ]I <sub>3</sub> ·2(CyPh <sub>2</sub> PO)·H <sub>2</sub> O·EtOH   | $D_{5h}$     | 341                  | 0                    | 3                  | 1400                                   | 5         |
| [Ho(HMPA) <sub>2</sub> (H <sub>2</sub> O) <sub>5</sub> ]Br <sub>3</sub> ·2HMPA                                                          | $D_{5h}$     | 320                  | 0                    | -                  | -                                      | 6         |
| [Ho(HMPA) <sub>2</sub> (H <sub>2</sub> O) <sub>5</sub> ]Cl <sub>6</sub> ·2HMPA·2H <sub>2</sub> O                                        | $D_{5h}$     | 290                  | 0                    | -                  | -                                      | 6         |
| HoSc <sub>2</sub> N@C <sub>80</sub>                                                                                                     | $C_{\infty}$ | 16.5                 | 2000                 | -                  | -                                      | 7         |
| [(Cp*)Ho(COT)]                                                                                                                          | $C_{\infty}$ | 7.4, 3.6             | 0                    | -                  | -                                      | 8         |
| [(Cp*)Ho <sub>0.05</sub> Y <sub>0.95</sub> (COT)]                                                                                       | $C_{\infty}$ | 33.8, 24.4           | 0                    | -                  | -                                      | 8         |
| [Ho <sub>4</sub> (μ <sub>3</sub> -OH) <sub>2</sub> (L <sup>2</sup> ) <sub>4</sub> (piv) <sub>2</sub> (DMF) <sub>2</sub> ]-2DMF          | $D_{4d}$     | 21.5                 | 5000                 | -                  | -                                      | 9         |
| [Pc <sub>2</sub> Ho <sub>0.02</sub> Y <sub>0.98</sub> ][TBA]                                                                            | $D_{4d}$     | - <sup>a</sup>       | -                    | 0.5                | 2800                                   | 10        |
| Ho(CH <sub>2</sub> SiMe <sub>3</sub> ) <sub>3</sub> (THF) <sub>2</sub>                                                                  | $C_s$        | 76                   | 0                    | -                  | -                                      | 11        |
| [(L <sup>3</sup> ) <sub>2</sub> Co <sub>2</sub> Ho][NO <sub>3</sub> ]                                                                   | $I_h$        | 8                    | 0                    | -                  | -                                      | 12        |
| K <sub>12</sub> [HoP <sub>5</sub> W <sub>30</sub> O <sub>110</sub> ]· <i>n</i> H <sub>2</sub> O                                         | -            | 0.8                  | 0                    | 2                  | 90                                     | 13        |
| Ho(CH <sub>2</sub> SiMe <sub>3</sub> ) <sub>3</sub> (QN) <sub>2</sub>                                                                   | $C_s$        | - <sup>b</sup>       | 0                    | -                  | -                                      | 11        |
| Ho(CH <sub>2</sub> SiMe <sub>3</sub> ) <sub>3</sub> (OPCy <sub>3</sub> ) <sub>2</sub>                                                   | $C_s$        | - <sup>b</sup>       | 0                    | -                  | -                                      | 11        |
| Ho(CH <sub>2</sub> SiMe <sub>3</sub> ) <sub>3</sub> (Lut) <sub>3</sub>                                                                  | $O_h$        | - <sup>b</sup>       | 0                    | -                  | -                                      | 11        |
| Na <sub>9</sub> [Ho(W <sub>5</sub> O <sub>18</sub> ) <sub>2</sub> ]                                                                     | $D_{4d}$     | - <sup>b</sup>       | 0                    | -                  | -                                      | 14        |
| K <sub>13</sub> [Ho(β <sub>2</sub> -SiW <sub>11</sub> O <sub>39</sub> ) <sub>2</sub> ]                                                  | $D_{4d}$     | - <sup>b</sup>       | 0                    | -                  | -                                      | 14        |
| [Ho(β-Mo <sub>8</sub> O <sub>26</sub> ) <sub>2</sub> ] <sup>5-</sup>                                                                    | $D_{4d}$     | - <sup>b</sup>       | 0                    | -                  | -                                      | 15        |
| [Ho(bphosCN) <sub>3</sub> (H <sub>2</sub> O)]·8H <sub>2</sub> O                                                                         | $C_{2v}$     | - <sup>b</sup>       | 0                    | -                  | -                                      | 16        |

<sup>a</sup>The data of ac susceptibility was not mentioned. <sup>b</sup>Ac magnetic susceptibilities showed frequency-dependent signals but no clear peak under zero dc field. tprpo = trispyrrolidinophosphineoxide; H<sub>2</sub>quinha = quinaldichydroxamic acid; dfpy = 3,5-difluoropyridine; py = pyridine; L<sup>1</sup> = <sup>t</sup>BuPO(NH<sup>i</sup>Pr)<sub>2</sub>; HMPA = hexamethylphosphorictriamide; Cp\* = pentamethylcyclopentadienide; COT = cyclooctatetraene; H<sub>2</sub>L<sup>2</sup> = 2-hydroxy-3-methoxy-phenylsalicylaldehyde; piv = pivalate; TBA = tetrabutylammonium; Pc = phthalocyanine; H<sub>3</sub>L<sup>3</sup> = (S)P[N(Me)NdCH-C<sub>6</sub>H<sub>3</sub>-2-OH-3-OMe]<sub>3</sub>; QN = quinuclidine; Lut = 3,5-lutidine; bphosCN = cyanomethylene-bis(5,5-dimethyl-2-oxo-1,3,2-λ<sup>5</sup>-dioxaphosphorinane).

**Table S2.** Crystal data and structure refinements of **1** and **2**.

| Compound                                                                                 | 1                                                                                               | 2                                                                                               |
|------------------------------------------------------------------------------------------|-------------------------------------------------------------------------------------------------|-------------------------------------------------------------------------------------------------|
| CCDC                                                                                     | 2059754                                                                                         | 2059755                                                                                         |
| Formula                                                                                  | C <sub>24</sub> H <sub>60</sub> Cl <sub>3</sub> N <sub>6</sub> O <sub>8</sub> P <sub>2</sub> Ho | C <sub>24</sub> H <sub>60</sub> Br <sub>3</sub> N <sub>6</sub> O <sub>8</sub> P <sub>2</sub> Ho |
| Formula weight                                                                           | 894.00                                                                                          | 1027.38                                                                                         |
| <i>T</i> (K)                                                                             | 293(2)                                                                                          | 293(2)                                                                                          |
| Crystal System                                                                           | orthorhombic                                                                                    | orthorhombic                                                                                    |
| Space Group                                                                              | <i>Pbca</i>                                                                                     | <i>Pbca</i>                                                                                     |
| <i>a</i> (Å)                                                                             | 9.9663(3)                                                                                       | 10.0871(3)                                                                                      |
| <i>b</i> (Å)                                                                             | 26.9370(9)                                                                                      | 26.8701(7)                                                                                      |
| <i>c</i> (Å)                                                                             | 30.2924(9)                                                                                      | 30.9089(12)                                                                                     |
| $\alpha$ (deg)                                                                           | 90                                                                                              | 90                                                                                              |
| $\beta$ (deg)                                                                            | 90                                                                                              | 90                                                                                              |
| $\gamma$ (deg)                                                                           | 90                                                                                              | 90                                                                                              |
| <i>Z</i>                                                                                 | 8                                                                                               | 8                                                                                               |
| <i>V</i> (Å <sup>3</sup> )                                                               | 8132.4(4)                                                                                       | 8377.6(4)                                                                                       |
| $\rho_{\text{calc}}$ (g/cm <sup>3</sup> )                                                | 1.460                                                                                           | 1.629                                                                                           |
| $\mu$ (mm <sup>-1</sup> )                                                                | 2.267                                                                                           | 4.871                                                                                           |
| <i>R</i> <sub>int</sub>                                                                  | 0.0609                                                                                          | 0.0495                                                                                          |
| GOF                                                                                      | 1.038                                                                                           | 1.017                                                                                           |
| <i>R</i> <sub>1</sub> , <i>wR</i> <sub>2</sub> [ <i>I</i> > 2σ( <i>I</i> )] <sup>a</sup> | 0.0546, 0.1327                                                                                  | 0.0416, 0.0816                                                                                  |
| <i>R</i> <sub>1</sub> , <i>wR</i> <sub>2</sub> (all data) <sup>b</sup>                   | 0.0833, 0.1461                                                                                  | 0.0822, 0.0929                                                                                  |

$${}^a R_1 = \sum (|F_o| - |F_c|) / \sum |F_o|, {}^b wR_2 = \left[ \sum w(F_o^2 - F_c^2)^2 / \sum w(F_o^2)^2 \right]^{1/2}.$$

**Table S3.** Selected bond lengths and angles of **1**.

| Bond/Angles | °/Å        | Bond/Angles | °/Å        |
|-------------|------------|-------------|------------|
| Ho-O1       | 2.205(5)   | O2-Ho1-O6   | 87.52(2)   |
| Ho-O2       | 2.215(5)   | O3-Ho1-O6   | 143.90(2)  |
| Ho-O3       | 2.366(5)   | O4-Ho1-O6   | 144.36(2)  |
| Ho-O4       | 2.344(5)   | O1-Ho1-O5   | 90.10(2)   |
| Ho-O5       | 2.343(5)   | O2-Ho1-O5   | 87.91(2)   |
| Ho-O6       | 2.356(5)   | O3-Ho1-O5   | 144.14(2)  |
| Ho-O7       | 2.355(5)   | O4-Ho1-O5   | 72.52(2)   |
| O1-Ho1-O2   | 177.94(19) | O6-Ho1-O5   | 71.96(2)   |
| O1-Ho1-O3   | 90.65(2)   | O1-Ho1-O7   | 89.47(2)   |
| O2-Ho1-O3   | 91.28(2)   | O2-Ho1-O7   | 91.82(2)   |
| O1-Ho1-O4   | 90.16(2)   | O3-Ho1-O7   | 71.79(2)   |
| O2-Ho1-O4   | 89.76(2)   | O4-Ho1-O7   | 143.43(19) |
| O3-Ho1-O4   | 71.65(2)   | O6-Ho1-O7   | 72.20(2)   |
| O1-Ho1-O6   | 91.35(2)   | O5-Ho1-O7   | 143.98(2)  |
| Ho···Cl1    | 4.6160(2)  | Ho···Cl3    | 4.6922(2)  |
| Ho···Cl2    | 4.5977(2)  |             |            |

**Table S4.** Selected bond lengths and angles of **2**.

| Bond/Angles | °/Å        | Bond/Angles | °/Å        |
|-------------|------------|-------------|------------|
| Ho-O1       | 2.193(4)   | O2-Ho1-O6   | 90.83(15)  |
| Ho-O2       | 2.198(4)   | O3-Ho1-O6   | 142.86(17) |
| Ho-O3       | 2.336(5)   | O4-Ho1-O6   | 144.37(14) |
| Ho-O4       | 2.348(4)   | O1-Ho1-O5   | 92.66(14)  |
| Ho-O5       | 2.353(4)   | O2-Ho1-O5   | 87.10(14)  |
| Ho-O6       | 2.354(4)   | O3-Ho1-O5   | 144.85(17) |
| Ho-O7       | 2.372(4)   | O4-Ho1-O5   | 72.26(14)  |
| O1-Ho1-O2   | 178.80(15) | O6-Ho1-O5   | 72.20(14)  |
| O1-Ho1-O3   | 90.12(17)  | O1-Ho1-O7   | 89.38(14)  |
| O2-Ho1-O3   | 89.41(17)  | O2-Ho1-O7   | 91.51(15)  |
| O1-Ho1-O4   | 88.92(14)  | O3-Ho1-O7   | 71.06(17)  |
| O2-Ho1-O4   | 89.89(15)  | O4-Ho1-O7   | 143.77(14) |
| O3-Ho1-O4   | 72.77(17)  | O6-Ho1-O7   | 71.81(14)  |
| O1-Ho1-O6   | 90.21(15)  | O5-Ho1-O7   | 143.96(14) |
| Ho···Br1    | 4.8452(9)  | Ho···Br3    | 4.7671(1)  |
| Ho···Br2    | 4.7883(9)  |             |            |

**Table S5.** Continuous shape measures calculations for Ho<sup>III</sup> ion in **1** and **2**.

| Symmetry | Shape                                | Deviation for 1 | Deviation for 2 |
|----------|--------------------------------------|-----------------|-----------------|
| $D_{7h}$ | Heptagon                             | 34.501          | 34.165          |
| $C_{6v}$ | Hexagonal pyramid                    | 25.663          | 25.323          |
| $D_{5h}$ | Pentagonal bipyramid                 | 0.112           | 0.132           |
| $C_{3v}$ | Capped octahedron                    | 8.061           | 8.125           |
| $C_{2v}$ | Capped trigonal prism                | 6.203           | 6.228           |
| $D_{5h}$ | Johnson pentagonal bipyramid         | 2.694           | 2.595           |
| $C_{3v}$ | Johnson elongated triangular pyramid | 24.549          | 24.152          |

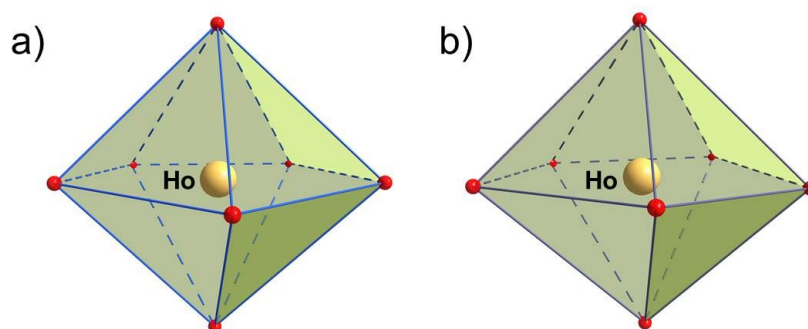

**Figure S1.** Coordination environment of Ho<sup>III</sup> ion of **1** (a) and **2** (b).

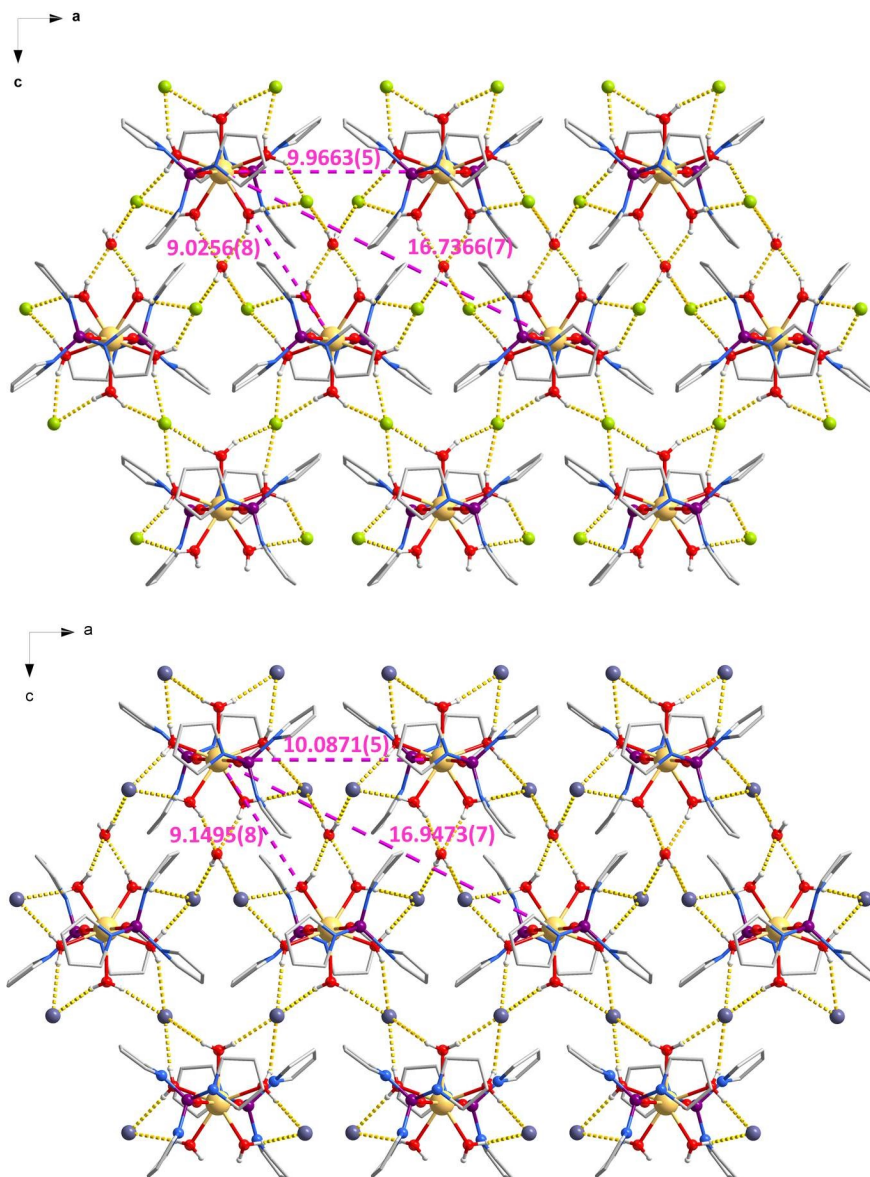

**Figure S2.** Crystal structures of **1** (up) and **2** (down) viewed along the *b* axis. Hydrogen atoms of tprpo are omitted for clarity. Atom color codes: Ho, yellow; O, red; N, light blue; P, violet; C, gray; H, light gray; Cl, lime; Br, blue gray. Gold dashed lines represent the hydrogen bonds between coordinated water molecules and free water molecules and counter ions. The pink dash lines correspond to the distances between neighboring Ho<sup>III</sup> centers.

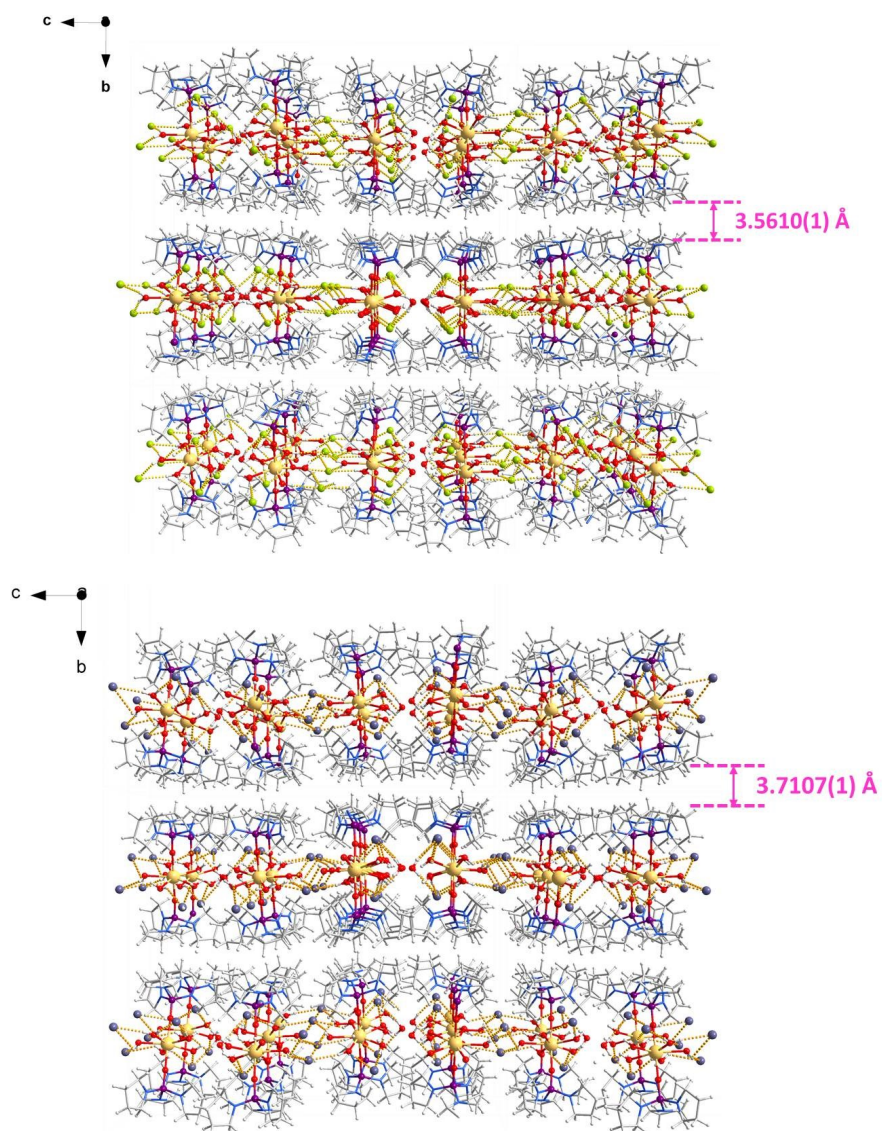

**Figure S3.** The 3D packing structure of **1** (up) and **2** (down). Atom color codes: Ho, yellow; O, red; N, light blue; P, violet; C, gray; H, light gray; Cl, lime; Br, blue gray. Gold dashed lines represent the hydrogen bonds between coordinated water molecules and free water molecules and counter ions.



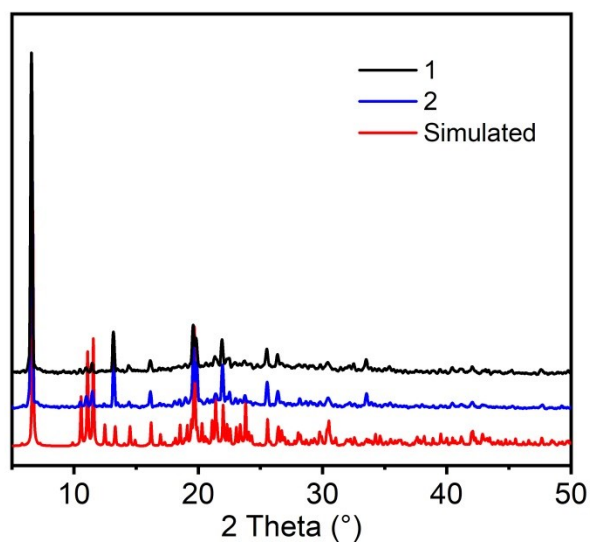

**Figure S4.** The powder X-ray diffraction patterns of **1** and **2** compared with the simulated pattern from the single-crystal data of **1**.

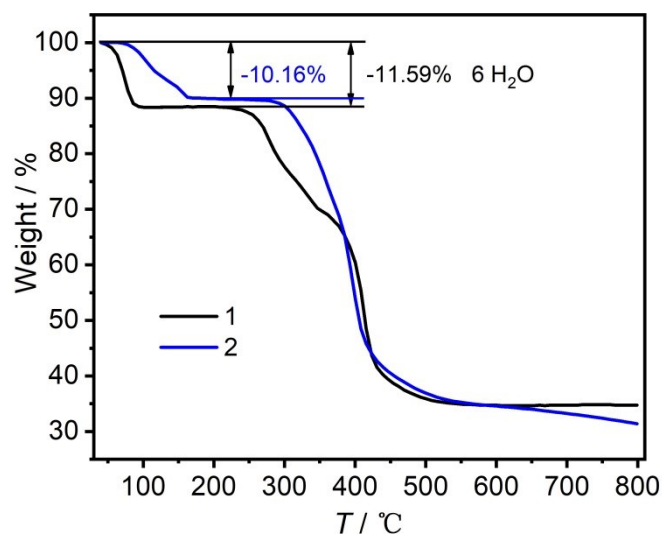

**Figure S5.** TGA of **1** and **2**.

### 3. Magnetic characterization data

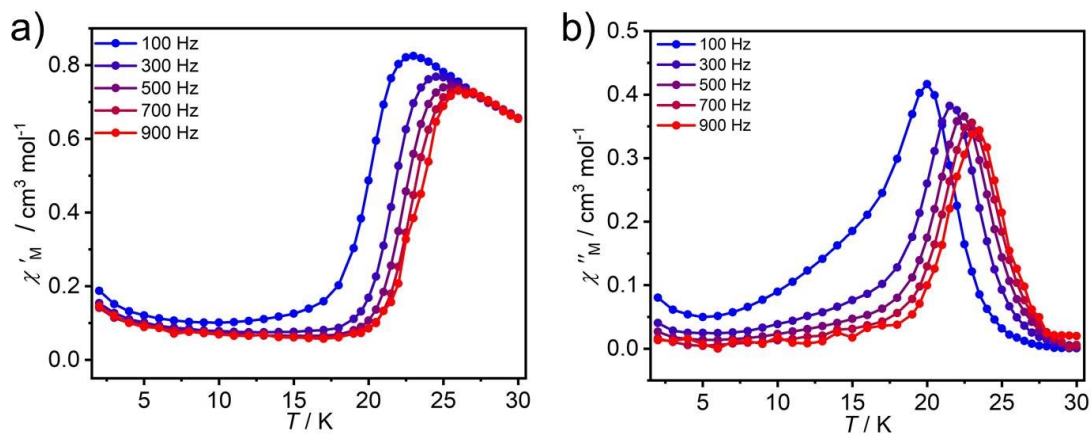

**Figure S6.** Frequency-dependent of in-phase and out-of-phase ac magnetic susceptibilities of **1** under zero dc field.

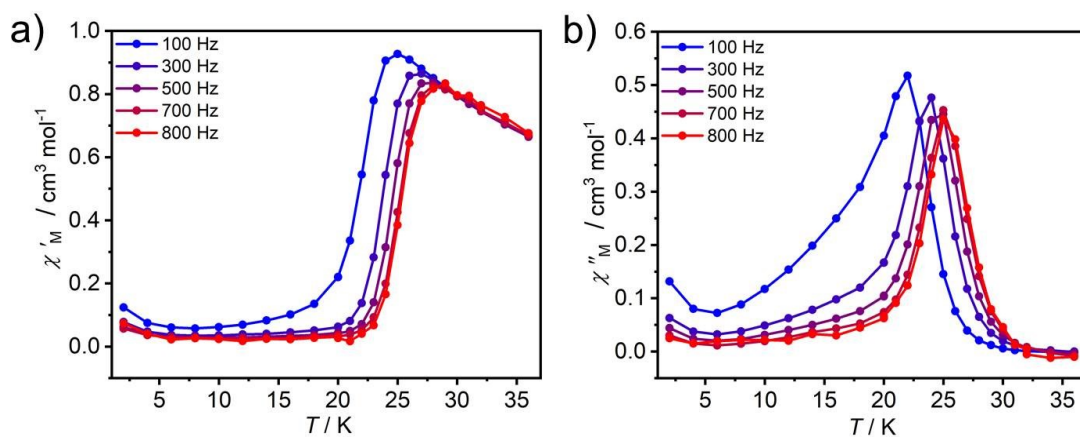

**Figure S7.** Frequency-dependent of in-phase and out-of-phase ac magnetic susceptibilities of **2** under zero dc field.

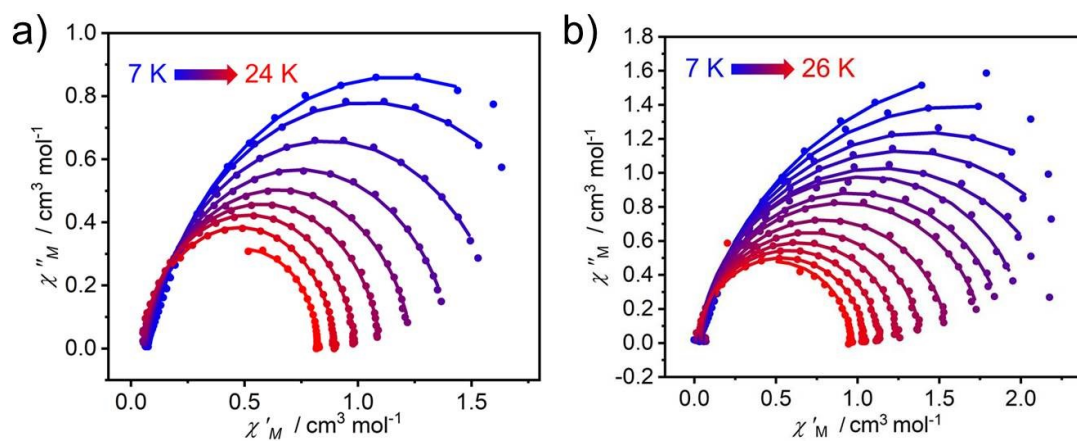

**Figure S8.** The Cole-Cole plots for **1** (a) and **2** (b). Solid lines are the fits with the Debye models.

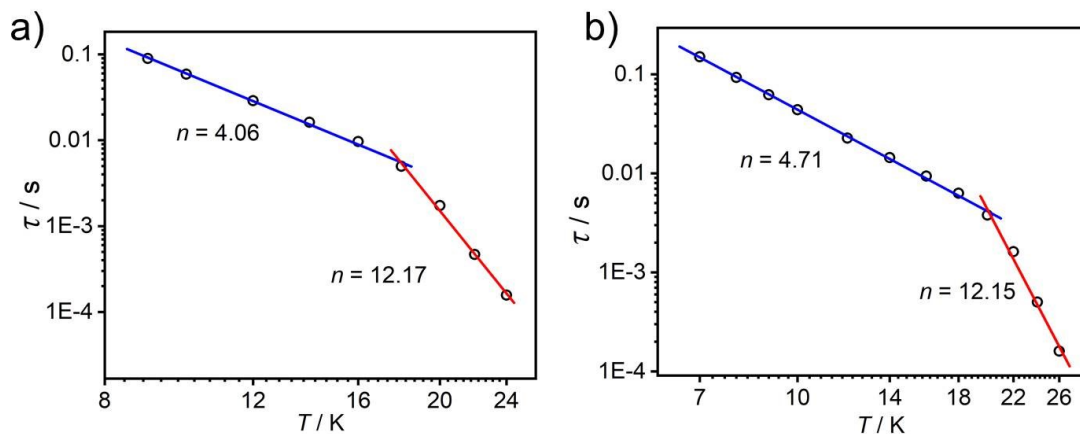

**Figure S9.** The  $\tau$  vs.  $T^{-n}$  plots shown in log-log scale for **1** (a) and **2** (b).

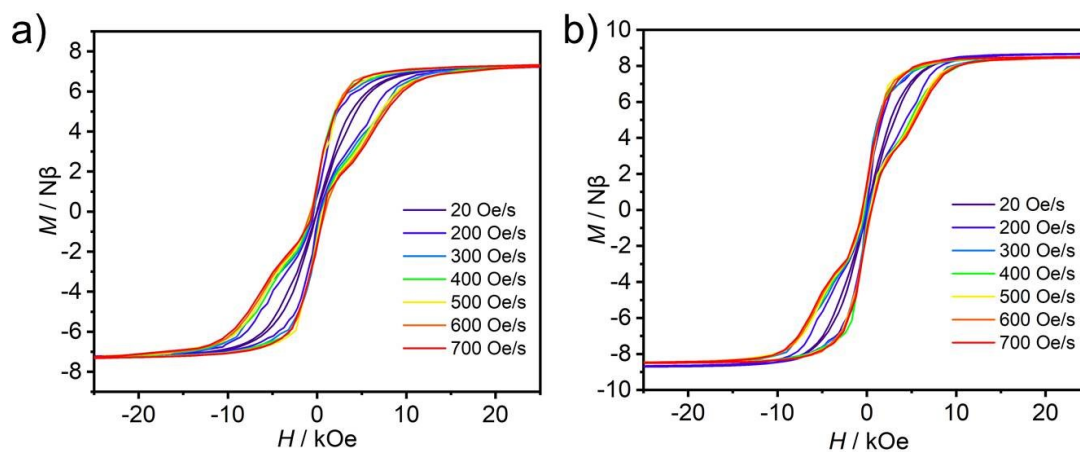

**Figure S10.** Magnetic hysteresis loops of **1** (a) and **2** (b) at 2 K and different field sweep rates.

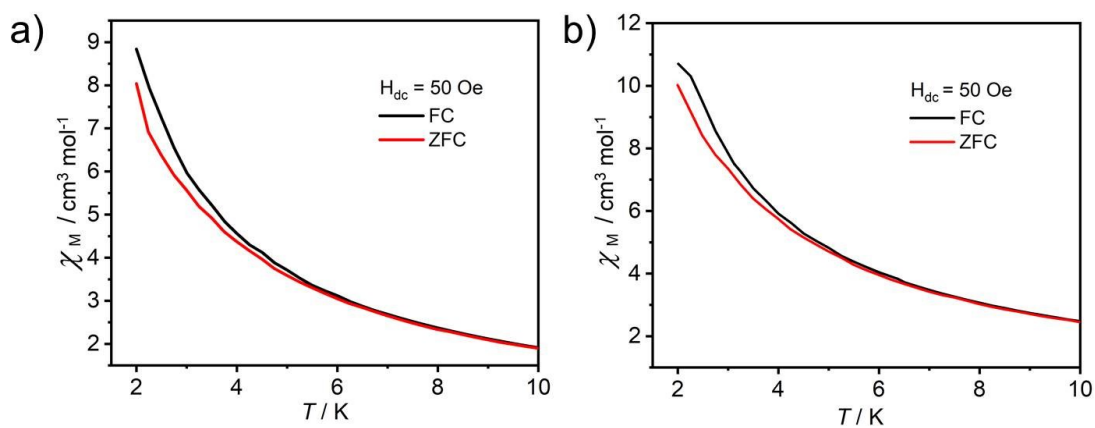

**Figure S11.** The Field cooled (FC) and Zero-Field cooled (ZFC) magnetic susceptibility of **1** (a) and **2** (b).

**Table S6.** The best fitting parameters of Cole-Cole plots of **1** under zero dc field.

| $T$ (K) | $\chi_s$ (cm <sup>3</sup> mol <sup>-1</sup> ) | $\chi_t$ (cm <sup>3</sup> mol <sup>-1</sup> ) | $\tau$ (s) | $\alpha$ |
|---------|-----------------------------------------------|-----------------------------------------------|------------|----------|
| 7       | 0.08944                                       | 3.23955                                       | 0.27758    | 0.20183  |
| 8       | 0.08598                                       | 2.63315                                       | 0.14865    | 0.16767  |
| 9       | 0.08139                                       | 2.25678                                       | 0.08957    | 0.14719  |
| 10      | 0.07647                                       | 2.01193                                       | 0.05897    | 0.13624  |
| 12      | 0.06901                                       | 1.65638                                       | 0.02884    | 0.11873  |
| 14      | 0.06231                                       | 1.41948                                       | 0.01621    | 0.11331  |
| 16      | 0.05818                                       | 1.24141                                       | 0.00964    | 0.10172  |
| 18      | 0.05261                                       | 1.10094                                       | 0.00498    | 0.08468  |
| 20      | 0.0508                                        | 0.9868                                        | 0.00174    | 0.06295  |
| 22      | 0.05936                                       | 0.89783                                       | 4.6727E-4  | 0.05538  |
| 24      | 0.18493                                       | 0.82201                                       | 1.57029E-4 | 0.00999  |

**Table S7.** The best fitting parameters of Cole-Cole plots of **2** under zero dc field.

| $T$ (K) | $\chi_s$ (cm <sup>3</sup> mol <sup>-1</sup> ) | $\chi_t$ (cm <sup>3</sup> mol <sup>-1</sup> ) | $\tau$ (s) | $\alpha$    |
|---------|-----------------------------------------------|-----------------------------------------------|------------|-------------|
| 7       | 0.04321                                       | 3.87826                                       | 0.14994    | 0.11384     |
| 8       | 0.04515                                       | 3.21341                                       | 0.09275    | 0.08178     |
| 9       | 0.04222                                       | 2.7872                                        | 0.062      | 0.06595     |
| 10      | 0.04369                                       | 2.50228                                       | 0.04377    | 0.05445     |
| 11      | 0.02667                                       | 2.26238                                       | 0.03164    | 0.05362     |
| 12      | 0.05594                                       | 2.02959                                       | 0.02262    | 0.00682     |
| 13      | 0.03768                                       | 1.9045                                        | 0.01832    | 0.03629     |
| 14      | 0.04045                                       | 1.76894                                       | 0.01443    | 0.03086     |
| 16      | 0.03771                                       | 1.55352                                       | 0.00938    | 0.02855     |
| 18      | 0.03528                                       | 1.38573                                       | 0.00628    | 0.0242      |
| 20      | 0.02794                                       | 1.24587                                       | 0.00379    | 0.02032     |
| 22      | 0.02767                                       | 1.13                                          | 0.00162    | 0.00714     |
| 24      | 0.03546                                       | 1.0374                                        | 5.00388E-4 | 2.11812E-15 |
| 26      | 2.99731E-15                                   | 0.95761                                       | 1.60026E-4 | 7.01192E-15 |

## References

- 1 V. Dolomanov, L. J. Bourhis, R. J. Gildea, J. A. K. Howard and H. Puschmann, *J. Appl. Cryst.*, 2009, **42**, 339.
- 2 S.-G. Wu, Z.-Y. Ruan, G.-Z. Huang, J.-Y. Zheng, V. Vieru, G. Taran, J. Wang, Y.-C. Chen, J.-L. Liu, L. T. A. Ho, Liviu F. Chibotaru, W. Wernsdorfer, X.-M. Chen and M.-L. Tong, *Chem*, 10.1016/j.chempr.2020.12.022.
- 3 Y. Ma, Y.-Q. Zhai, Y.-S. Ding, T. Han and Y.-Z. Zheng, *Chem. Commun.*, 2020, **56**, 3979.
- 4 S. K. Gupta, T. Rajeshkumar, G. Rajaraman and R. Murugavel, *Dalton Trans.*, 2018, **47**, 357.
- 5 Y.-C. Chen, J.-L. Liu, W. Wernsdorfer, D. Liu, L. F. Chibotaru, X. M. Chen and M.-L. Tong, *Angew. Chem. Int. Ed.*, 2017, **56**, 4996.
- 6 L.-L. Li, H.-D. Su, S. Liu and W.-Z. Wang, *Dalton Trans.*, 2020, **49**, 6703.
- 7 J. Dreiser, R. Westerström, Y. Zhang, A. A. Popov, L. Dunsch, K. Krämer, S.-X. Liu, S. Decurtins and T. Greber, *Chem. Eur. J.*, 2014, **20**, 13536.
- 8 S.-D. Jiang, S.-S. Liu, L.-N. Zhou, B.-W. Wang, Z.-M. Wang and S. Gao, *Inorg. Chem.*, 2012, **51**, 3079.
- 9 W.-W. Kuang, L.-L. Zhu, Y. Xu and P.-P. Yang, *Inorg. Chem. Commun.*, 2015, **61**, 169.
- 10 N. Ishikawa, M. Sugita and W. Wernsdorfer, *J. Am. Chem. Soc.*, 2005, **127**, 3650.
- 11 S.-M. Chen, Y.-Q. Zhang, J. Xiong, B.-W. Wang and S. Gao, *Inorg. Chem.*, 2020, **59**, 5835.
- 12 V. Chandrasekhar, B. M. Pandian, J. J. Vittal and Rodolphe Clérac, *Inorg. Chem.*, 2009, **48**, 1148.
- 13 S. C.-Serra, J. M. C.-Juan, E. Coronado, A. G.-Arino, A. Camon, M. Evangelisti, F. Luis, M. J. M.-Pérez and J. Sesé, *J. Am. Chem. Soc.*, 2012, **134**, 14982.
- 14 M. A. AlDamen, S. C.-Serra, J. M. C.-Juan, E. Coronado, A. G.-Ariño, C. M.-Gastaldo, F. Luis and O. Montero, *Inorg. Chem.*, 2009, **48**, 3467.
- 15 J. J. Baldoví, Y. Duan, C. Bustos, S. C.-Serra, P. Gouzerh, R. Villanneau, G. Gontard, J. M. C.-Juan, A. G.-Ariño, C. G.-Saiz, *Dalton Trans.*, 2016, **45**, 16653.
- 16 C. Maxim, D. G. Branza, C. Tiseanu, M. Rouzieres, R. Clerac, M. Andruh and N. Avarvari, *Inorg. Chem.*, 2014, **53**, 2708.
